# Supplementary material
Source: publisher figshare collection journal article supplement (https://tandf.figshare.com/ndownloader/files/15110816)
Supplement: Supplementary file 1 [file 15110816]

**Supplementary material for Kuntsman and Rattle, “Towards a Paradigmatic Shift in Sustainability Studies: A Systematic Review of Peer Reviewed Literature and Future Agenda Setting to Consider Environmental (Un)Sustainability of Digital Communication”, *Environmental Communication*, 2019.**

## Appendix 1. Flowchart of search process.

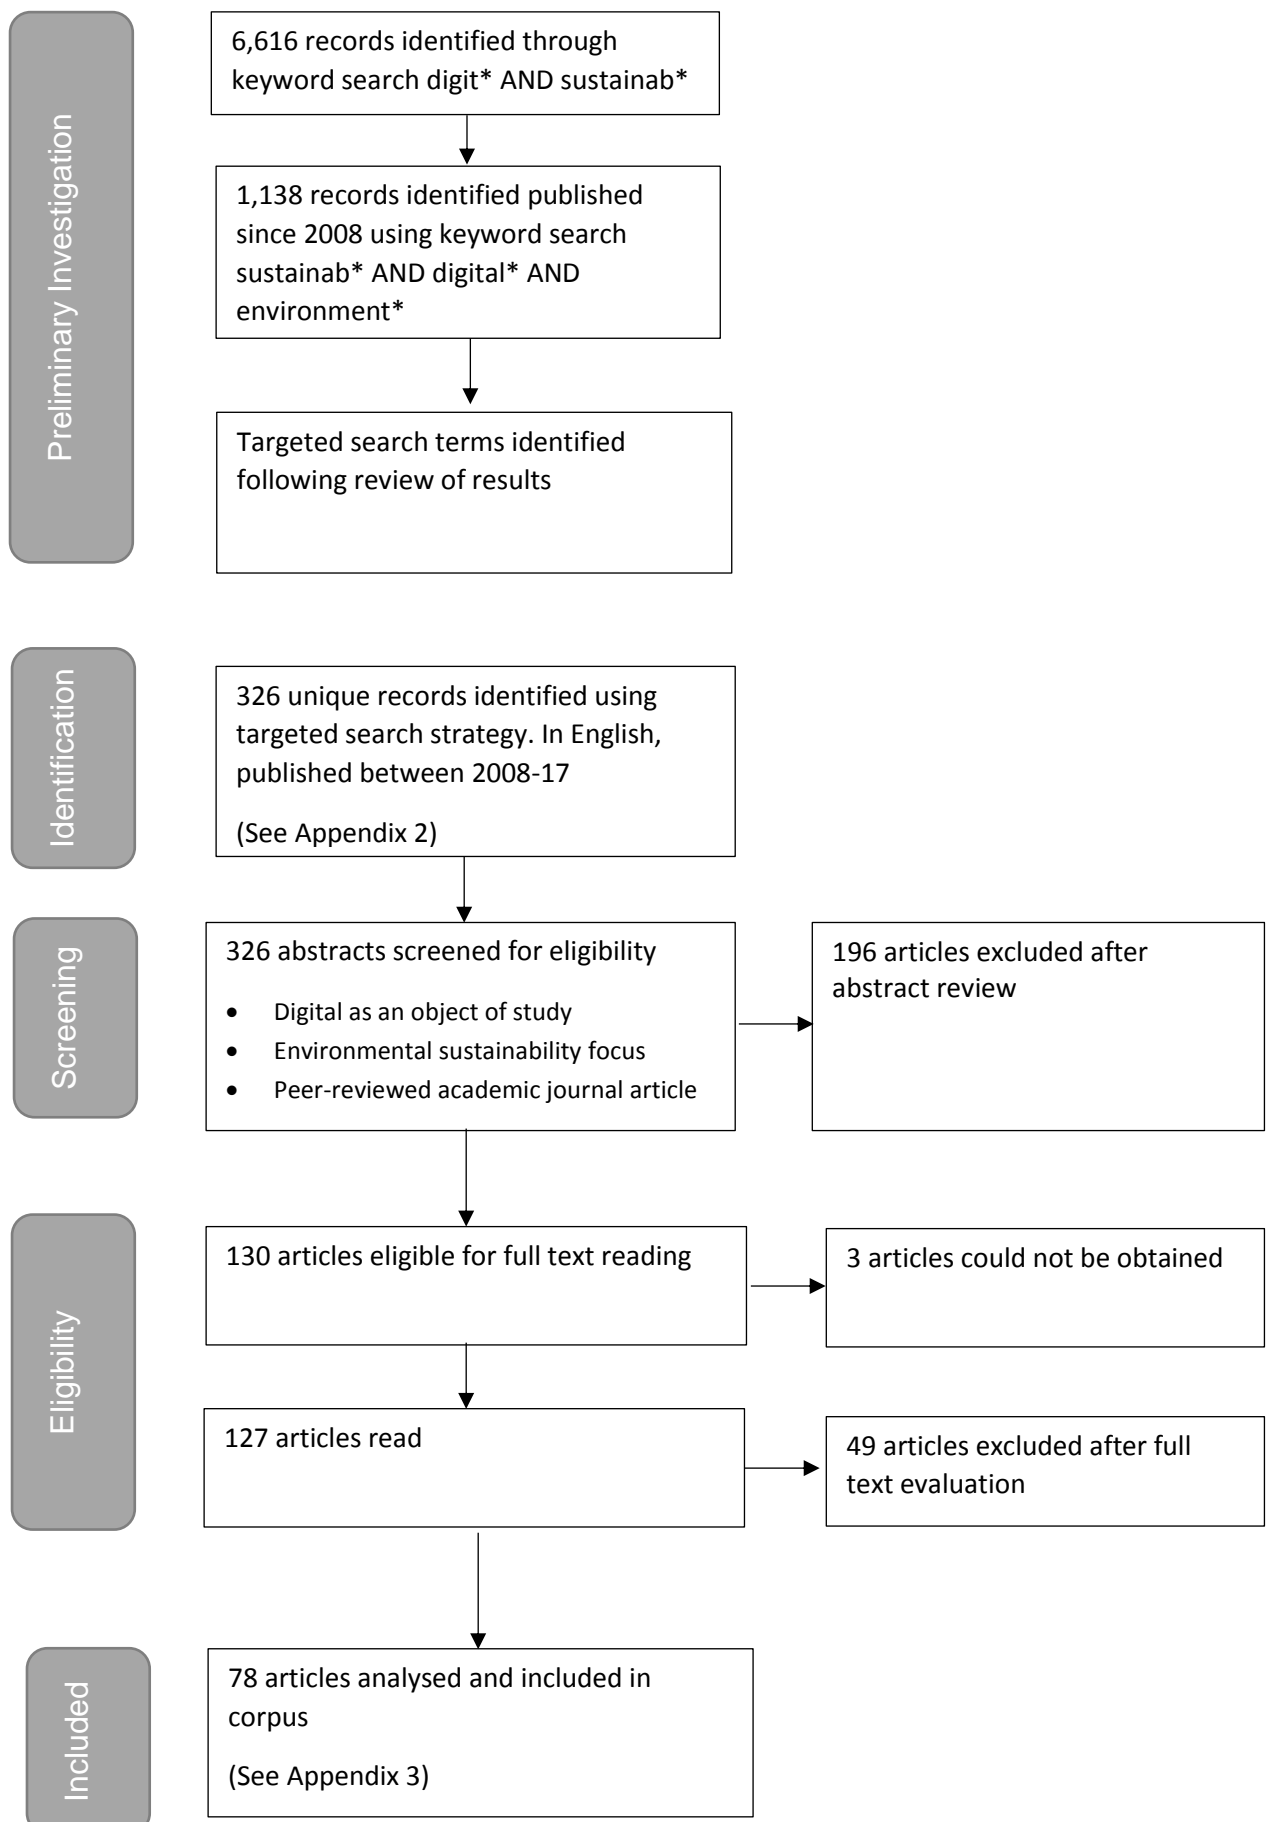

**Appendix 2. Table of search term combinations and results.**

| Term one                     | Term two                                         | Number of results<br>Title , abstract and keyword<br>English only 2008-2017 |
|------------------------------|--------------------------------------------------|-----------------------------------------------------------------------------|
| "Sustainable production"     | Digital OR Online                                | 38                                                                          |
| "Sustainable consumption"    |                                                  | 49                                                                          |
| Sustainable waste management |                                                  | 3                                                                           |
| E-waste                      |                                                  | 40                                                                          |
| "Sustainable communit*"      |                                                  | 18                                                                          |
| "Education for sustainab*"   |                                                  | 35                                                                          |
| "Sustainab* future*"         |                                                  | 27                                                                          |
| "Sustainab* IT"              |                                                  | 10                                                                          |
| "Sustainable production"     | Apps OR "Mobile<br>technolog*" OR<br>Smartphone* | 0                                                                           |
| "Sustainable consumption"    |                                                  | 4                                                                           |
| Sustainable waste management |                                                  | 7                                                                           |
| E-waste                      |                                                  | 5                                                                           |
| "Sustainable communit*"      |                                                  | 0                                                                           |
| "Education for sustainab*"   |                                                  | 1                                                                           |
| "Sustainab* future*"         |                                                  | 2                                                                           |
| "Sustainab* IT"              |                                                  | 2                                                                           |
| "Sustainable production"     | Virtual                                          | 13                                                                          |
| "Sustainable consumption"    |                                                  | 10                                                                          |
| Sustainable waste management |                                                  | 35                                                                          |
| E-waste                      |                                                  | 4                                                                           |
| "Sustainable communit*"      |                                                  | 0                                                                           |
| "Education for sustainab*"   |                                                  | 9                                                                           |
| "Sustainab* future*"         |                                                  | 8                                                                           |
| "Sustainab* IT"              |                                                  | 6                                                                           |
| Total                        |                                                  | 326                                                                         |

### Appendix 3. Corpus of reviewed articles.

1. Borchiellini, R., et al., *The Energy Center Initiative at Politecnico di Torino: Practical experiences on energy efficiency measures in the municipality of Torino*. International Journal of Heat and Technology, 2017. **35**: p. 1-9.
2. Venkatachary, S.K., J. Prasad, and R. Samikannu, *Challenges, Opportunities and Profitability in Virtual Power Plant Business Models in Sub Saharan Africa-Botswana*. International Journal of Energy Economics and Policy, 2017. **7**(4): p. 48-58.
3. Di Salvo, A.L., et al., *Can cloud computing be labeled as "green"? Insights under an environmental accounting perspective*. Renewable and Sustainable Energy Reviews, 2017. **69**: p. 514-526.
4. Shuja, J., et al., *Sustainable cloud data centers: a survey of enabling techniques and technologies*. Renewable and Sustainable Energy Reviews, 2016. **62**: p. 195-214.
5. Sitzenfrei, R., M. Möderl, and W. Rauch, *Assessing the impact of transitions from centralised to decentralised water solutions on existing infrastructures—Integrated city-scale analysis with VIBe*. Water research, 2013. **47**(20): p. 7251-7263.
6. Mavropoulos, A., M. Tsakona, and A. Anthouli, *Urban waste management and the mobile challenge*. Waste Management & Research, 2015. **33**(4): p. 381-387.
7. Digiesi, S., et al., *A web-app for implementing a 'Carbon Footprint Calculator' for smart waste management systems*. Published on Procedia Environmental Science, Engineering and Management, 2016. **3**(3): p. 165-172.
8. Loveday, D.L., et al., *The energy and monetary implications of the '24/7' 'always on' society*. Energy Policy, 2008. **36**(12): p. 4639-4645.
9. Baytar, F. and S. Ashdown, *An Exploratory Study of Interaction Patterns around the Use of Virtual Apparel Design and Try-on Technology*. Fashion Practice, 2015. **7**(1): p. 31-52.
10. Matsuda, M. and F. Kimura, *Usage of a digital eco-factory for sustainable manufacturing*. CIRP Journal of Manufacturing Science and Technology, 2015. **9**(Supplement C): p. 97-106.
11. Ketter, W., et al., *A multiagent competitive gaming platform to address societal challenges*. MIS Quarterly: Management Information Systems, 2016. **40**(2): p. 447-460.
12. Frostell, B.M., et al., *Modeling both direct and indirect environmental load of purchase decisions: a web-based tool addressing household metabolism*. Environmental Modelling & Software, 2015. **71**: p. 138-147.
13. Rohani, M., M. Fan, and C. Yu, *Advanced visualization and simulation techniques for modern construction management*. Indoor and Built Environment, 2014. **23**(5): p. 665-674.
14. Wong, J.K.W. and J. Zhou, *Enhancing environmental sustainability over building life cycles through green BIM: A review*. Automation in Construction, 2015. **57**: p. 156-165.
15. Ali, A. and A. Frew, J., *ICT and sustainable tourism development: an innovative perspective*. Journal of Hospitality and Tourism Technology, 2014. **5**(1): p. 2-16.
16. Kolios, S., C. Stylios, and A. Petunin, *A WebGIS platform to monitor environmental conditions in ports and their surroundings in South Eastern Europe*. Environmental monitoring and assessment, 2015. **187**(9): p. 574.
17. Gale, F., F. Ascui, and H. Lovell, *Sensing reality? New monitoring technologies for global sustainability standards*. Global Environmental Politics, 2017. **17**(2): p. 65-83.

18. Kalogiannakis, M. and S. Papadakis, *Combining mobile technologies in environmental education: a Greek case study*. International Journal of Mobile Learning and Organisation, 2017. **11**(2): p. 108-130.
19. Schaal, S. and A. Lude, *Using Mobile Devices in Environmental Education and Education for Sustainable Development—Comparing Theory and Practice in a Nation Wide Survey*. Sustainability, 2015. **7**(8): p. 10153-10170.
20. Giusti, L., et al., *En Plein Air: a mobile learning approach for sustainability education in the wild*. International Journal of Mobile Human Computer Interaction (IJMHCI), 2012. **4**(2): p. 44-58.
21. Howard, P., *Digital Citizenship in the Afterschool Space: Implications for Education for Sustainable Development*. Journal of Teacher Education for Sustainability, 2015. **17**(1): p. 23-34.
22. Dogbey, J., et al., *Using Smartphone Technology in Environmental Sustainability Education: The Case of the Maasai Mara Region in Kenya*. International Journal of Mobile and Blended Learning (IJMBL), 2014. **6**(1): p. 1-16.
23. Selby, R., D., K. Carter, P., and S. Gage, H., *Survey concerning electronic textbooks: Assessing student behavior and environmental considerations*. International Journal of Sustainability in Higher Education, 2014. **15**(2): p. 142-156.
24. Hatton, C., M. Mooney, and J. Nicholls, *Digital rolling role across global classrooms: a geodramatic framework*. NJ, 2016. **40**(1): p. 27-39.
25. Rosenblum, E., et al., *Innovative EcoCloud™ Helps Silicon Valley Companies Adopt Sustainable Practices*. International Journal of Innovation Science, 2011. **3**(1): p. 3-8.
26. Bryson, M.A., *Schaumburg's Sustainable Future: student research, social media, and suburban sustainability*. Journal of Environmental Studies and Sciences, 2017. **7**(2): p. 288-295.
27. Rice, M. and T. Hancock, *Equity, sustainability and governance in urban settings*. Global health promotion, 2016. **23**(1\_suppl): p. 94-97.
28. Rokka, J. and J. Moisander, *Environmental dialogue in online communities: negotiating ecological citizenship among global travellers*. International Journal of Consumer Studies, 2009. **33**(2): p. 199-205.
29. Wade, R., *Pedagogy, places and people*. Journal of Teacher Education for Sustainability, 2012. **14**(2): p. 147-167.
30. Papadamou, T., et al., *Second Life: A Virtual Learning Center for the Study of Sharks*. International Journal of Emerging Technologies in Learning (iJET), 2011. **6**(2): p. 19-25.
31. Sewilam, H., et al., *Competence-based and game-based capacity development for sustainable water management in Germany*. Environmental Earth Sciences, 2017. **76**(3): p. 131.
32. Fabricatore, C. and X. López, *Sustainability Learning through Gaming: An Exploratory Study*. Electronic Journal of e-learning, 2012. **10**(2): p. 209-222.
33. Dulic, A., J. Angel, and S. Sheppard, *Designing futures: Inquiry in climate change communication*. Futures, 2016. **81**: p. 54-67.
34. Altomonte, S., et al., *Interactive and situated learning in education for sustainability*. International Journal of Sustainability in Higher Education, 2016. **17**(3): p. 417-443.
35. Keane, L. and M. Keane, *Eco Literacy: An Eco Web Greening Public Imagination*. Design Principles & Practice: An International Journal, 2010. **4**(4).
36. Dovros, N. and V. Makrakis, *Transforming the classroom into a reflective community: a blended learning instructional approach*. Journal of Teacher Education for Sustainability, 2012. **14**(2): p. 73-88.

37. Makrakis, V. and N. Kostoulas-Makrakis, *Course curricular design and development of the M. Sc. programme in the field of ICT in education for sustainable development*. Journal of Teacher Education for Sustainability, 2012. **14**(2): p. 5-40.
38. Blewitt, J., *The green campus is also a virtual one*. International Journal of Environment and Sustainable Development, 2010. **9**(4): p. 392-400.
39. Novo, M. and M.-Á. Murga-Menoyo, *Educational advances and trends for sustainable development: a research project on educational innovation*. Journal of Baltic Science Education, 2010. **9**(4).
40. Dlouhá, J., L. Macháčková-Henderson, and J. Dlouhý, *Learning networks with involvement of higher education institutions*. Journal of Cleaner Production, 2013. **49**: p. 95-104.
41. Décamps, A., et al., *Sulitest: A collaborative initiative to support and assess sustainability literacy in higher education*. The International Journal of Management Education, 2017. **15**(2): p. 138-152.
42. O’Gorman, L. and J. Davis, *Ecological footprinting: its potential as a tool for change in preservice teacher education*. Environmental Education Research, 2013. **19**(6): p. 779-791.
43. Sivapalan, S. and S. Sivapalan, *Sustainability, blended learning and the undergraduate communication skills classroom: negotiating engineering undergraduates’ expectations and perceptions*. On the Horizon, 2017. **25**(1): p. 7-23.
44. Sivapalan, S., M.J. Clifford, and S. Speight, *Engineering education for sustainable development: using online learning to support the new paradigms*. Australasian Journal of Engineering Education, 2016. **21**(2): p. 61-73.
45. Leire, C., et al., *Online teaching going massive: input and outcomes*. Journal of Cleaner Production, 2016. **123**: p. 230-233.
46. Rose, G., K. Ryan, and C. Desha, *Implementing a holistic process for embedding sustainability: a case study in first year engineering, Monash University, Australia*. Journal of Cleaner Production, 2015. **106**: p. 229-238.
47. Piscicelli, L., T. Cooper, and T. Fisher, *The role of values in collaborative consumption: insights from a product-service system for lending and borrowing in the UK*. Journal of Cleaner Production, 2015. **97**: p. 21-29.
48. Nghiem, T. and L. Carrasco, *Mobile applications to link sustainable consumption with impacts on the environment and biodiversity*. BioScience, 2016. **66**(5): p. 384-392.
49. Demarque, C., et al., *Nudging sustainable consumption: The use of descriptive norms to promote a minority behavior in a realistic online shopping environment*. Journal of Environmental Psychology, 2015. **43**: p. 166-174.
50. Saari, U.A., R.J. Baumgartner, and S.J. Mäkinen, *Eco-Friendly Brands to Drive Sustainable Development: Replication and Extension of the Brand Experience Scale in a Cross-National Context*. Sustainability, 2017. **9**(7): p. 1286.
51. He, R., Y. Xiong, and Z. Lin, *Carbon emissions in a dual channel closed loop supply chain: the impact of consumer free riding behavior*. Journal of Cleaner Production, 2016. **134**: p. 384-394.
52. Joyner Armstrong, C. and H. Park, *Sustainability and collaborative apparel consumption: putting the digital ‘sharing’ economy under the microscope*. International Journal of Fashion Design, Technology and Education, 2017: p. 1-11.
53. Eden, S., *Blurring the boundaries: Prosumption, circularity and online sustainable consumption through Freecycle*. Journal of Consumer Culture, 2015: p. 1469540515586871.
54. Frenken, K., *Political economies and environmental futures for the sharing economy*. Phil. Trans. R. Soc. A, 2017. **375**(2095): p. 20160367.

55. Lazorko, K., *Promotion of sustainable consumption of food by virtual communities*. Acta Scientiarum Polonorum. Oeconomia, 2015. **14**(2).
56. Lee, Y.C., *Corporate Sustainable Development and Marketing Communications on Social Media: Fortune 500 Enterprises*. Business Strategy and the Environment, 2017. **26**(5): p. 569-583.
57. Clausen, J., et al., *Contribution of online trading of used goods to resource efficiency: An empirical study of eBay users*. Sustainability, 2010. **2**(6): p. 1810-1830.
58. Lekakis, E.J., *ICTs and ethical consumption: The political and market futures of fair trade*. Futures, 2014. **62**: p. 164-172.
59. Parguel, B., R. Lunardo, and F. Benoit-Moreau, *Sustainability of the sharing economy in question: When second-hand peer-to-peer platforms stimulate indulgent consumption*. Technological Forecasting and Social Change, 2017.
60. Pickren, G., *Geographies of E-waste: Towards a Political Ecology Approach to E-waste and Digital Technologies*. Geography Compass, 2014. **8**(2): p. 111-124.
61. Nnorom, I., C and O. Osibanjo, *Electronic waste (e-waste): Material flows and management practices in Nigeria*. Waste Management, 2008. **28**(8): p. 1472-1479.
62. Osibanjo, O. and I. Nnorom, C., *Material flows of mobile phones and accessories in Nigeria: environmental implications and sound end-of-life management options*. Environmental Impact Assessment Review, 2008. **28**(2): p. 198-213.
63. Oteng-Ababio, M., *E-waste: an emerging challenge to solid waste management in Ghana*. International Development Planning Review, 2010. **32**(2): p. 191-206.
64. Ndzibah, E., *CSR in Ghana? Diversity should not mean dumping*. Management of Environmental Quality: An International Journal, 2009. **20**(3): p. 271-277.
65. Nnorom, I., C and O. Osibanjo, *Overview of electronic waste (e-waste) management practices and legislations, and their poor applications in the developing countries*. Resources, conservation and recycling, 2008. **52**(6): p. 843-858.
66. Cumps, B., *Extending an ICT4D Computer Re-use Model with E-waste Handling Activities: A Case Study*. Information Technology for Development, 2015. **21**(4): p. 677-693.
67. Ciocoiu, C.N., D.L. Hincu, and C.R. Dobrea, *Quantitative approaches in exploring the link between digital economy and e-waste*. Metalurgia International 2012. **17**(3): p. 186-196.
68. Szamalek, K. and K. Galos, *Metals in Spent Mobile Phones (SMP) – a new challenge for mineral resources management*, in *Gospodarka Surowcami Mineralnymi*. 2016. p. 45.
69. Charles, R.G., et al., *An investigation of trends in precious metal and copper content of RAM modules in WEEE: Implications for long term recycling potential*. Waste Management, 2017. **60**: p. 505-520.
70. Son, K.-B., D.S. Lee, and S.-R. Lim, *Effect of technology convergence for tablet PC on potential environmental impacts from heavy metals*. International Journal of Sustainable Development & World Ecology, 2016. **23**(2): p. 154-162.
71. Mishima, K. and H. Nishimura, *Requirement analysis to promote small-sized E-waste collection from consumers*. Waste Management & Research, 2016. **34**(2): p. 122-128.
72. Ongondo, F.O. and I.D. Williams, *Mobile phone collection, reuse and recycling in the UK*. Waste Management, 2011. **31**(6): p. 1307-1315.
73. Panambunan-Ferse, M. and A. Breiter, *Assessing the side-effects of ICT development: E-waste production and management: A case study about cell phone end-of-life in Manado, Indonesia*. Technology in Society, 2013. **35**(3): p. 223-231.

74. Long, E., et al., *Technical solutions to improve global sustainable management of waste electrical and electronic equipment (WEEE) in the EU and China*. Journal of Remanufacturing, 2016. **6**(1): p. 1.
75. Xu, X., S. Zeng, and Y. He, *The influence of e-services on customer online purchasing behavior toward remanufactured products*. International Journal of Production Economics, 2017. **187**: p. 113-125.
76. Zink, T., et al., *Comparative life cycle assessment of smartphone reuse: repurposing vs. refurbishment*. The International Journal of Life Cycle Assessment, 2014. **19**(5): p. 1099-1109.
77. Gomez, B.A. and K. Evans, *A Practical Application of TrimCloud: Using TrimCloud as an Educational Technology in Developing Countries*. International Journal of Cloud Applications and Computing (IJCAC), 2016. **6**(2): p. 37-48.
78. Okewu, E., et al., *Optimizing Green Computing Awareness for Environmental Sustainability and Economic Security as a Stochastic Optimization Problem*. Sustainability, 2017. **9**(10): p. 1857.
